# Supplementary material
Source: PubMed Central journal article supplement (PMC4642453)

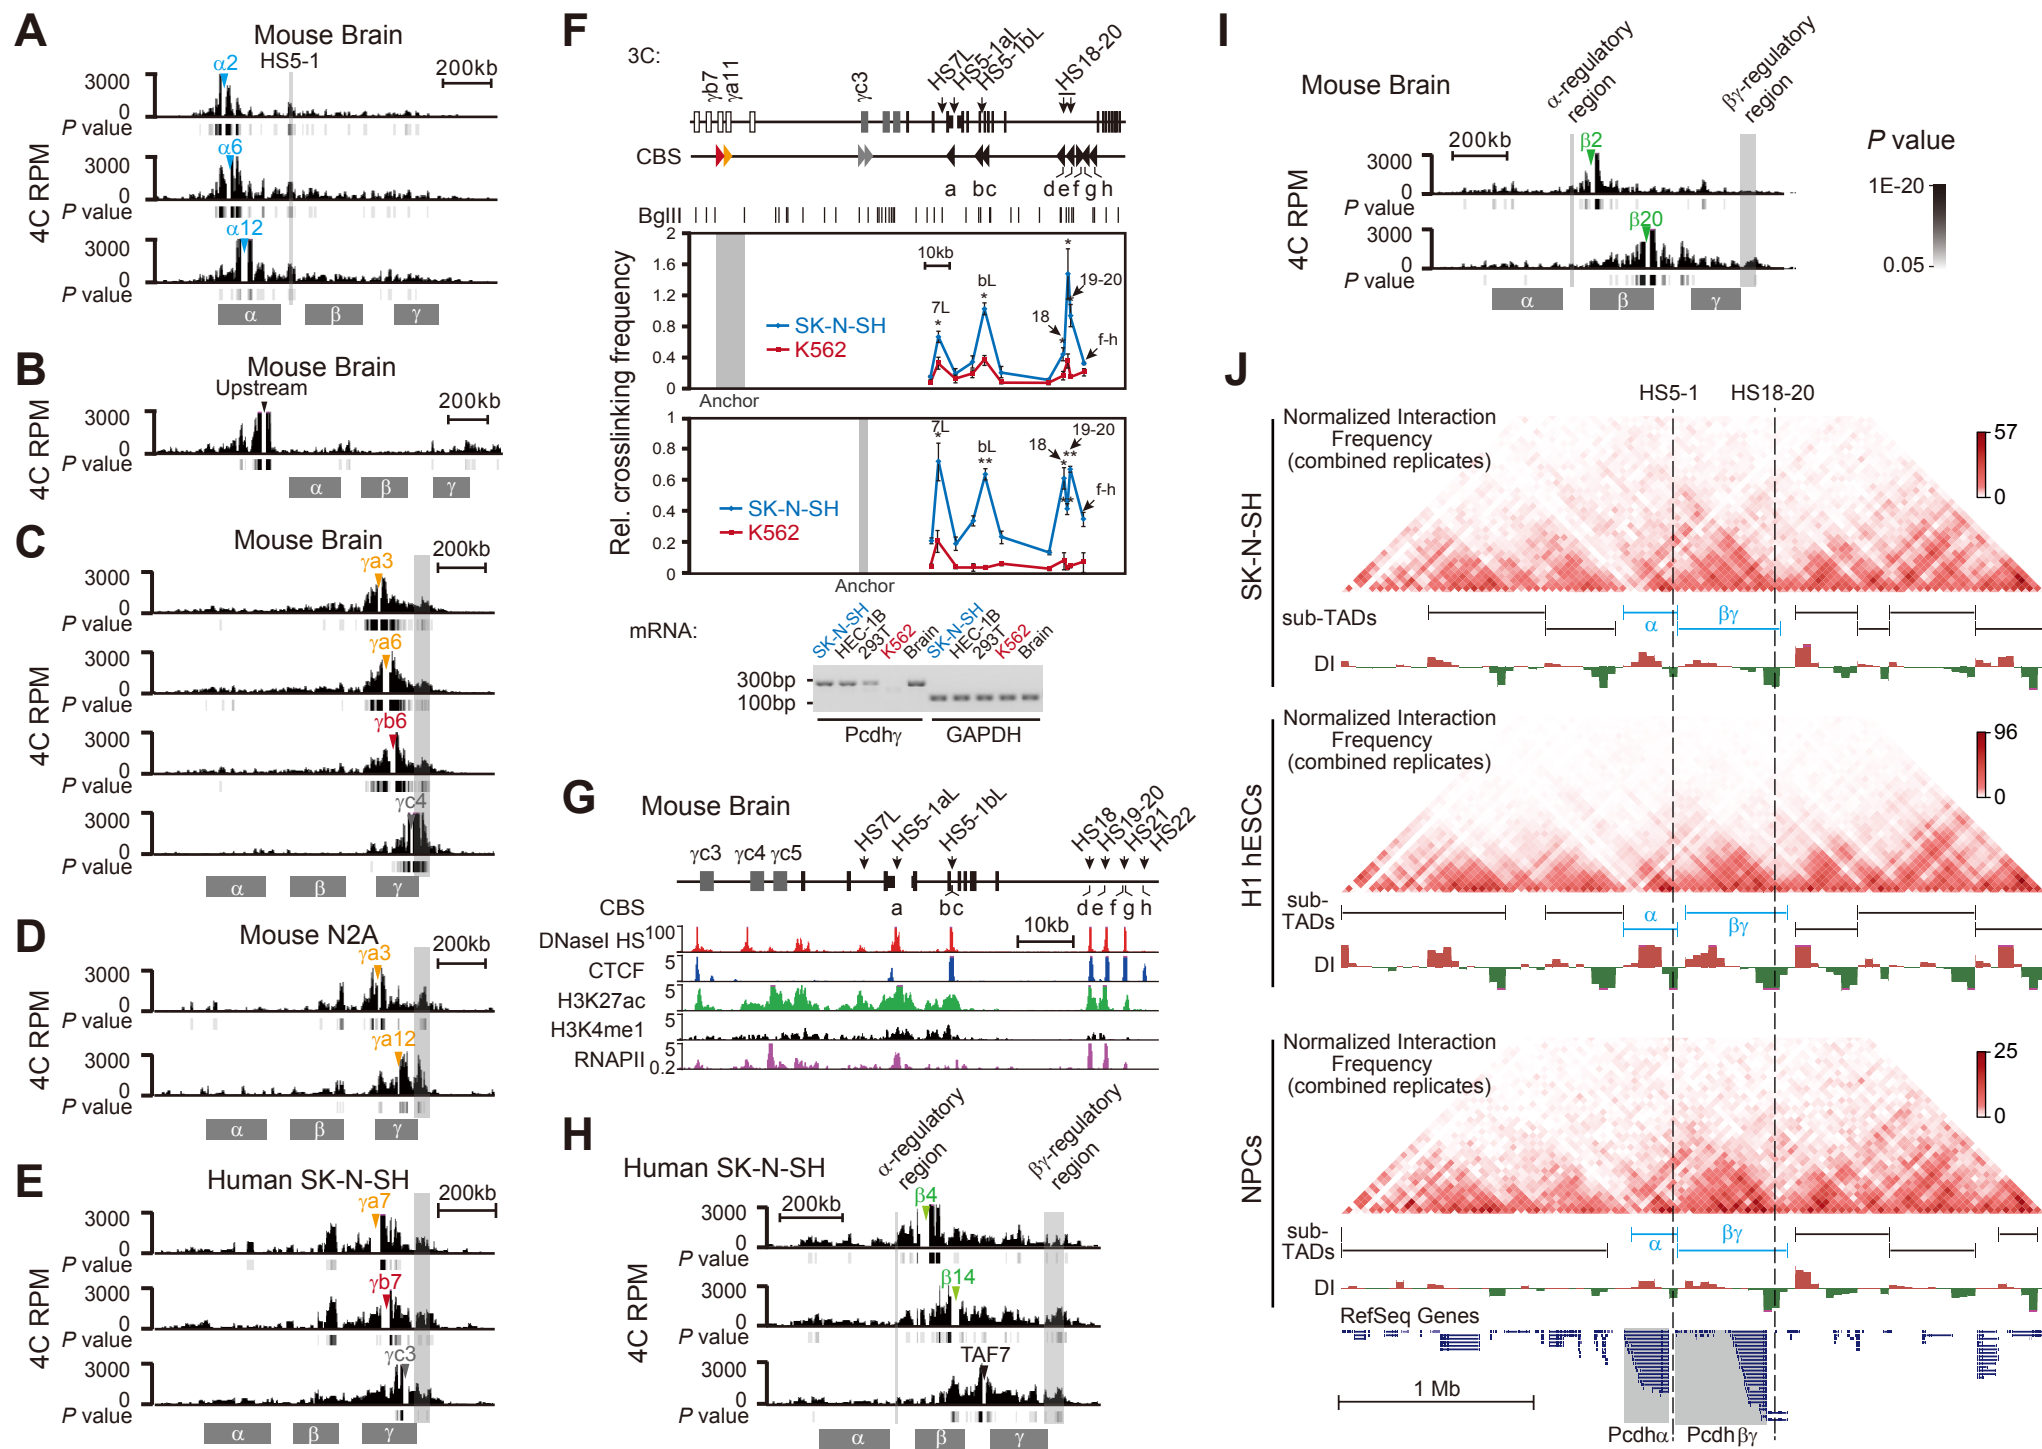

**A**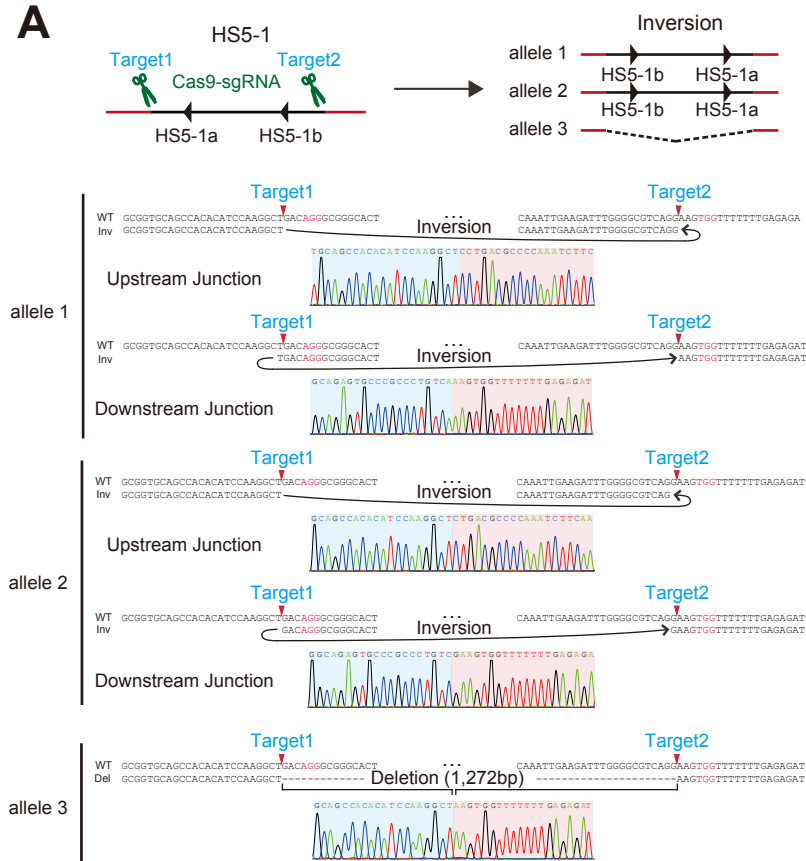**C**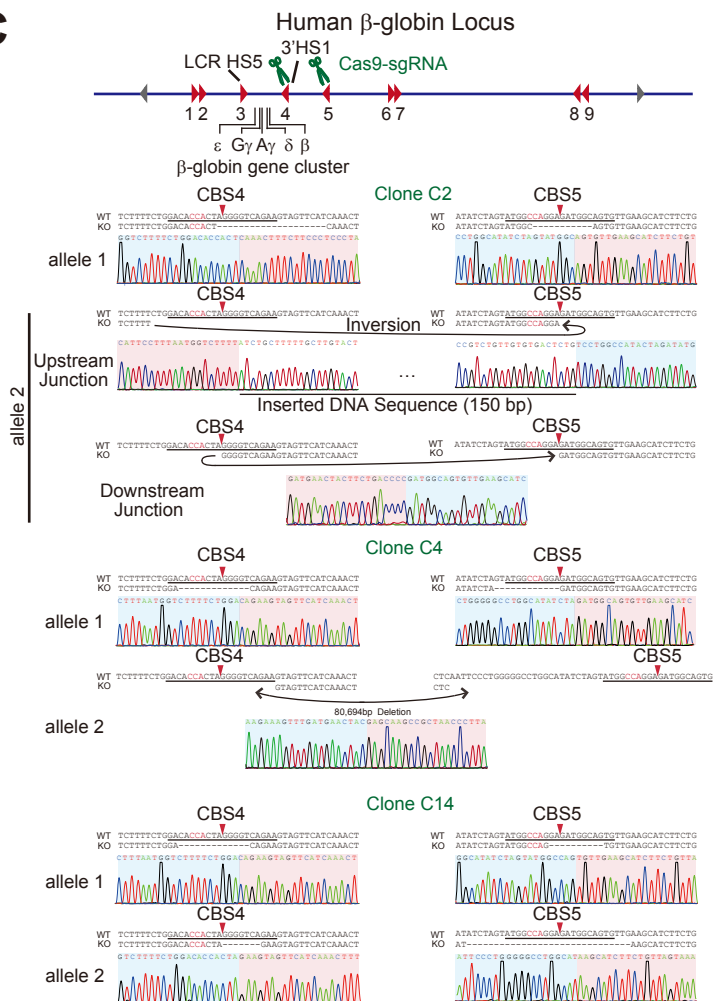**B**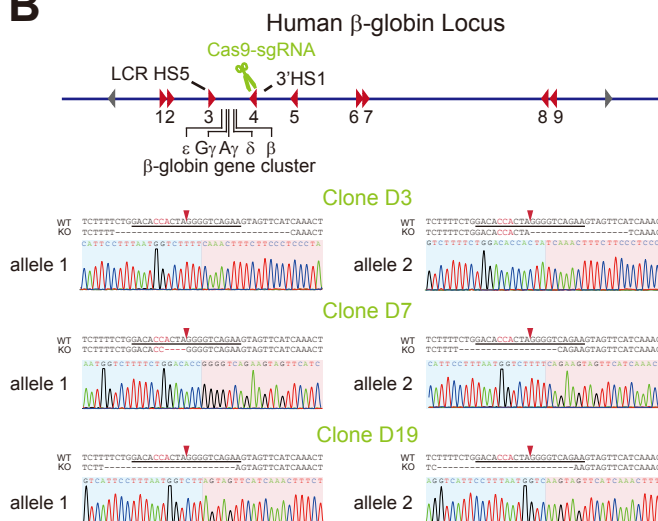**D**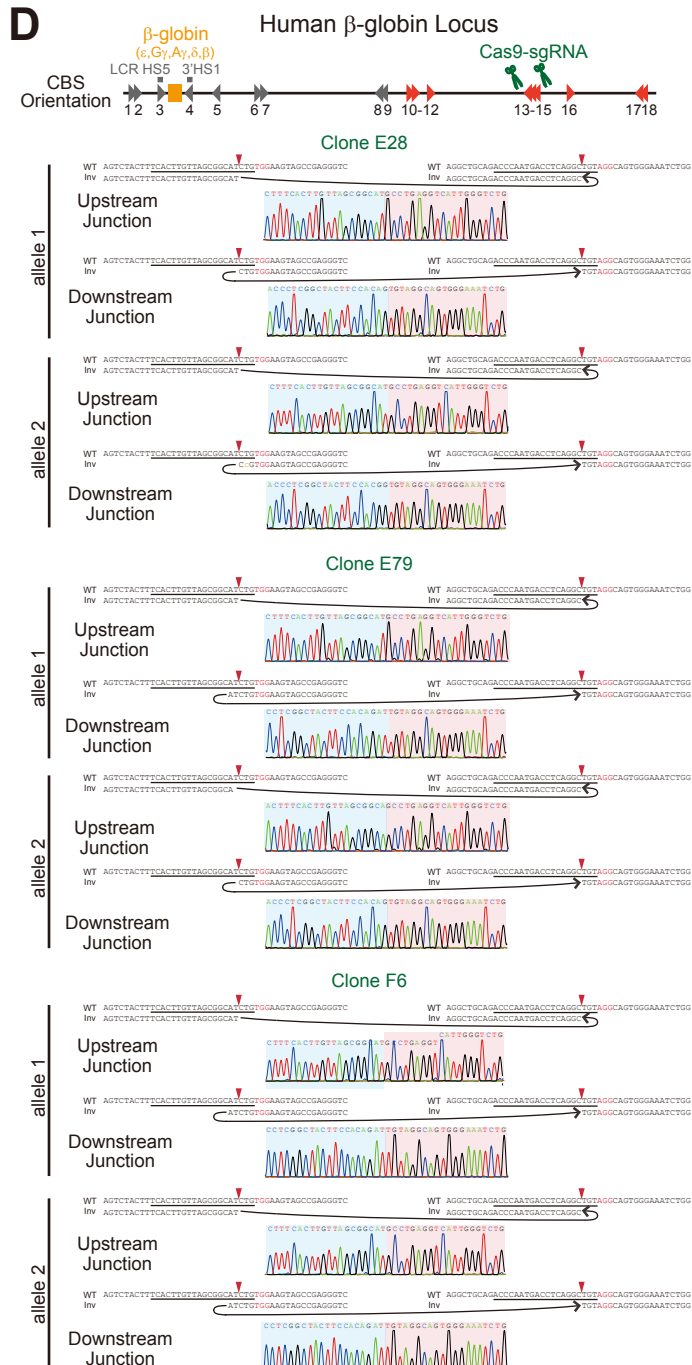

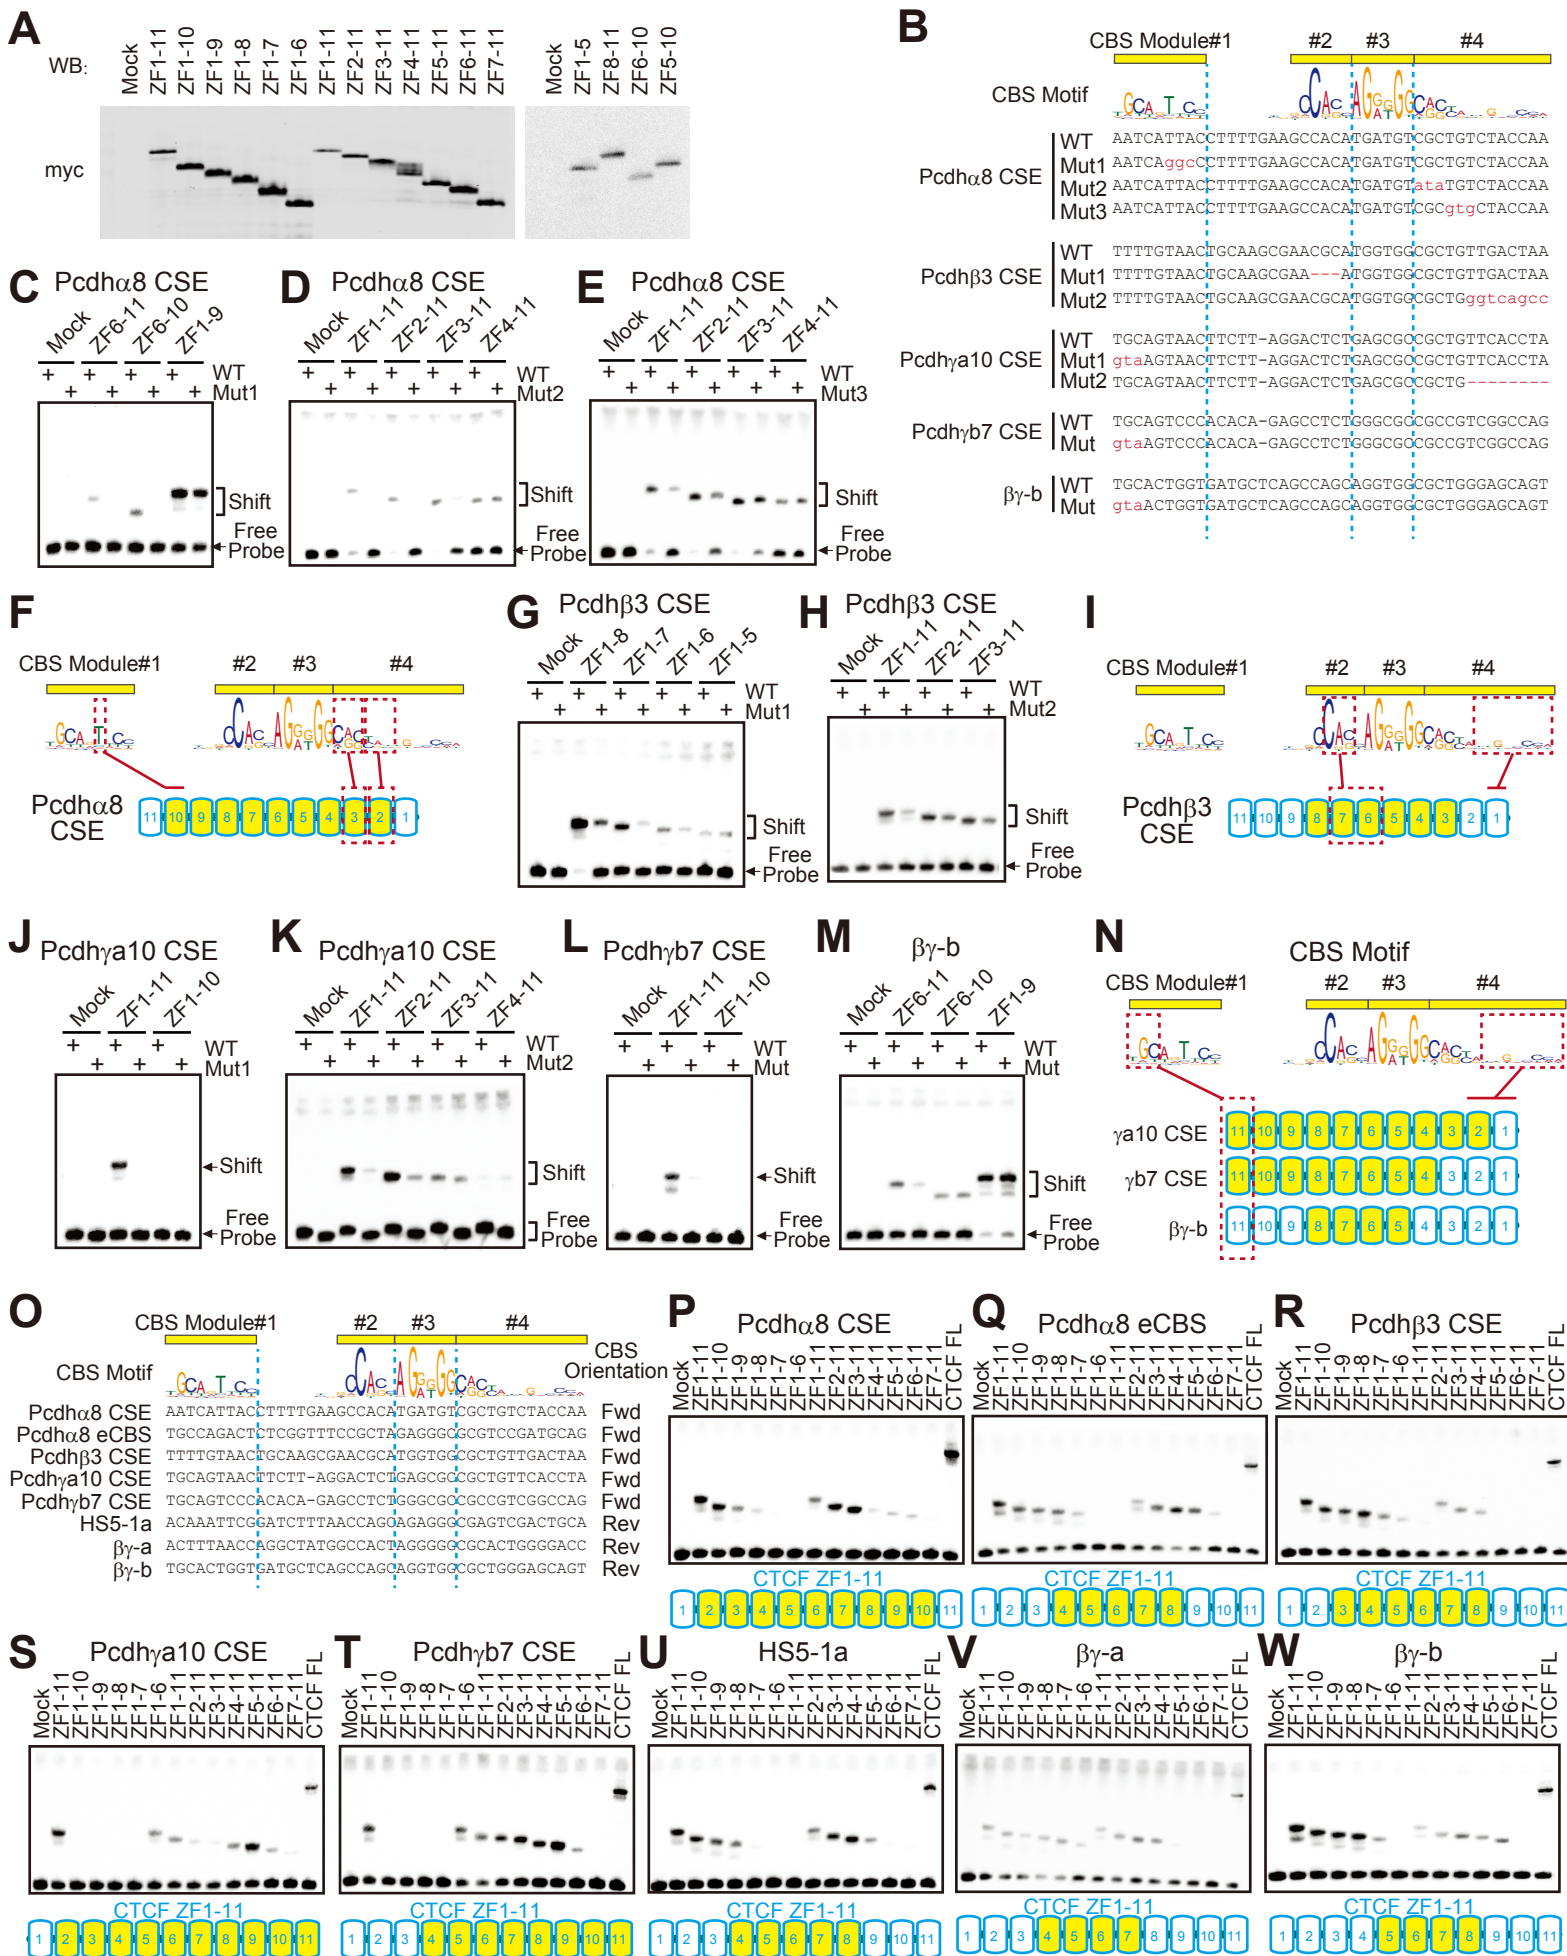

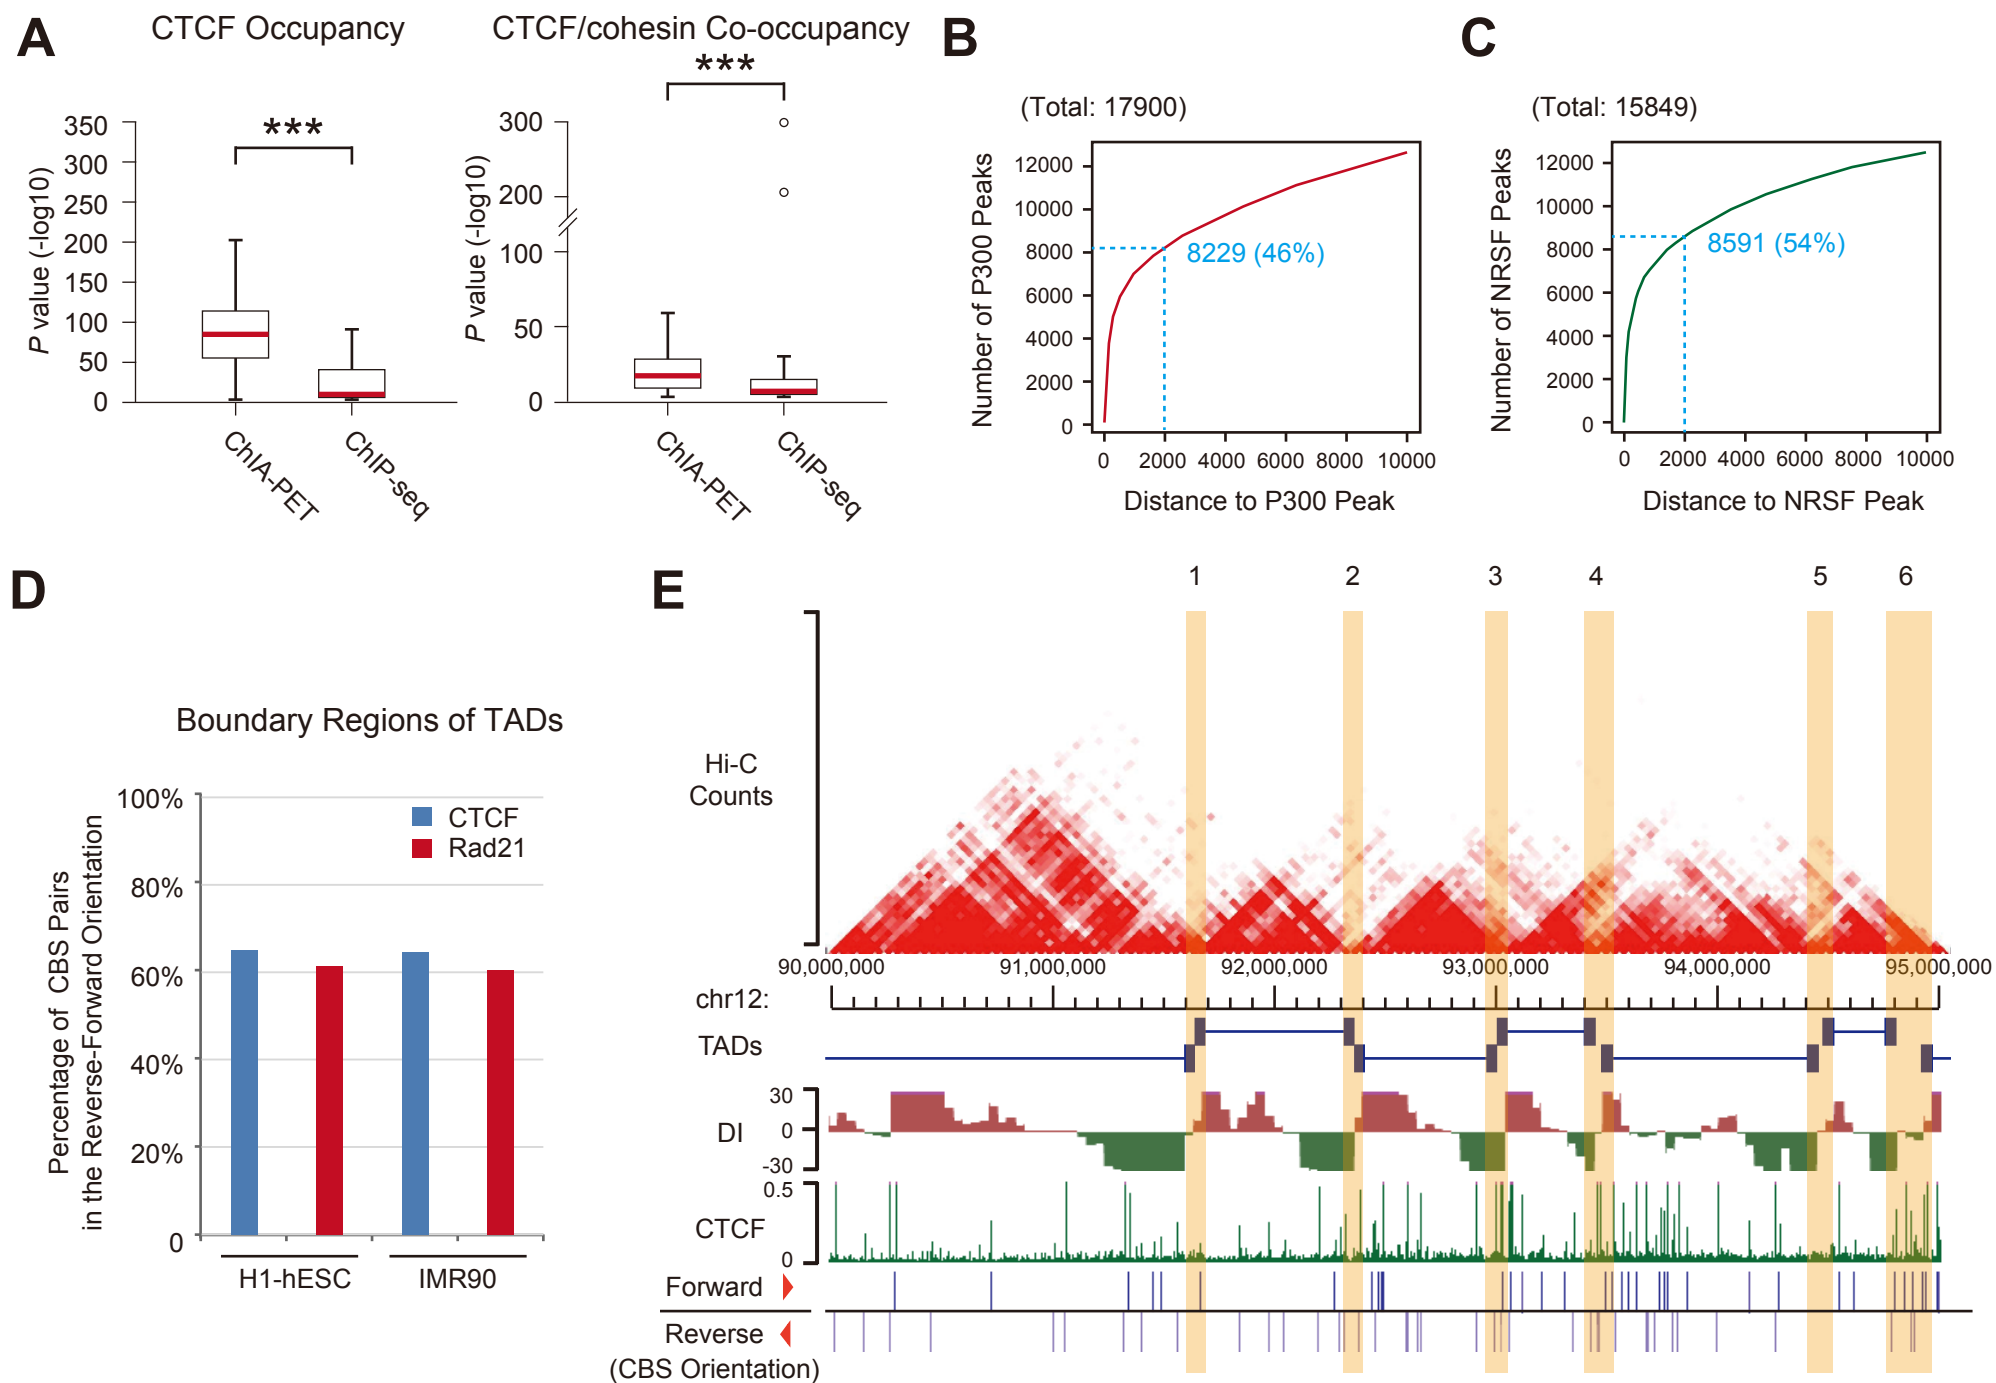

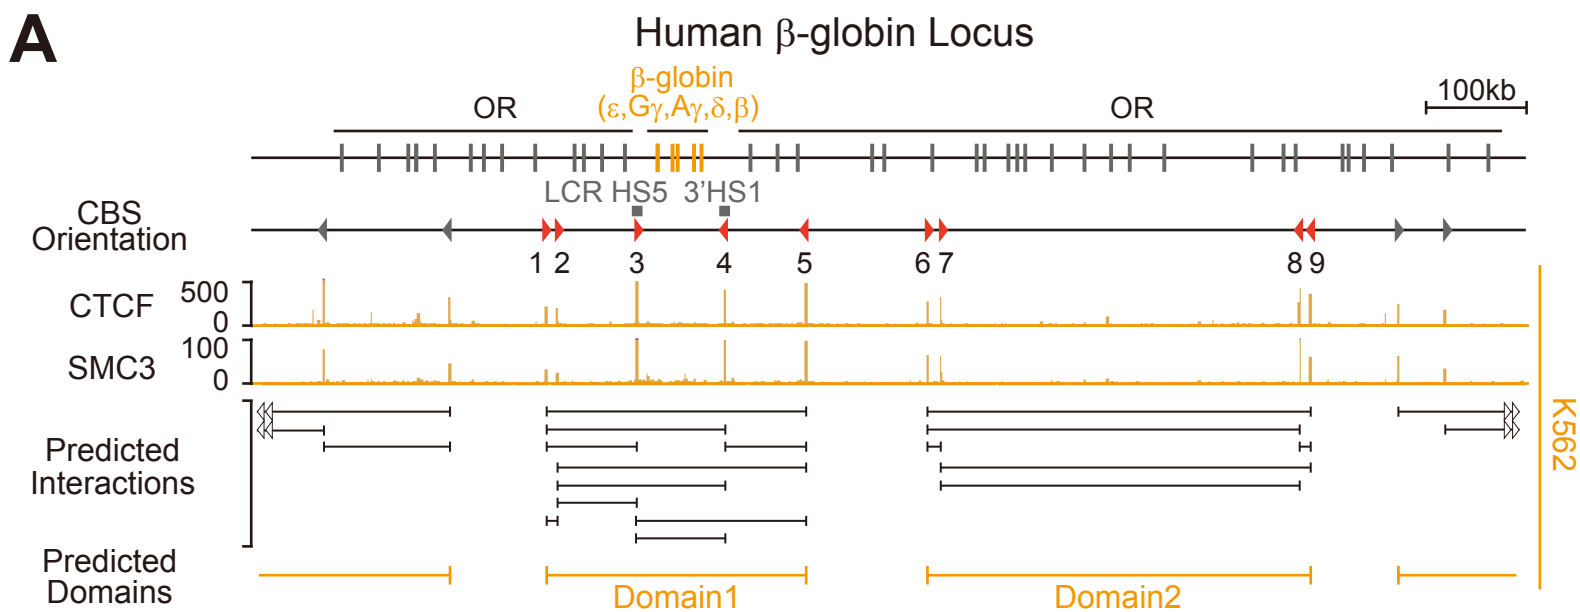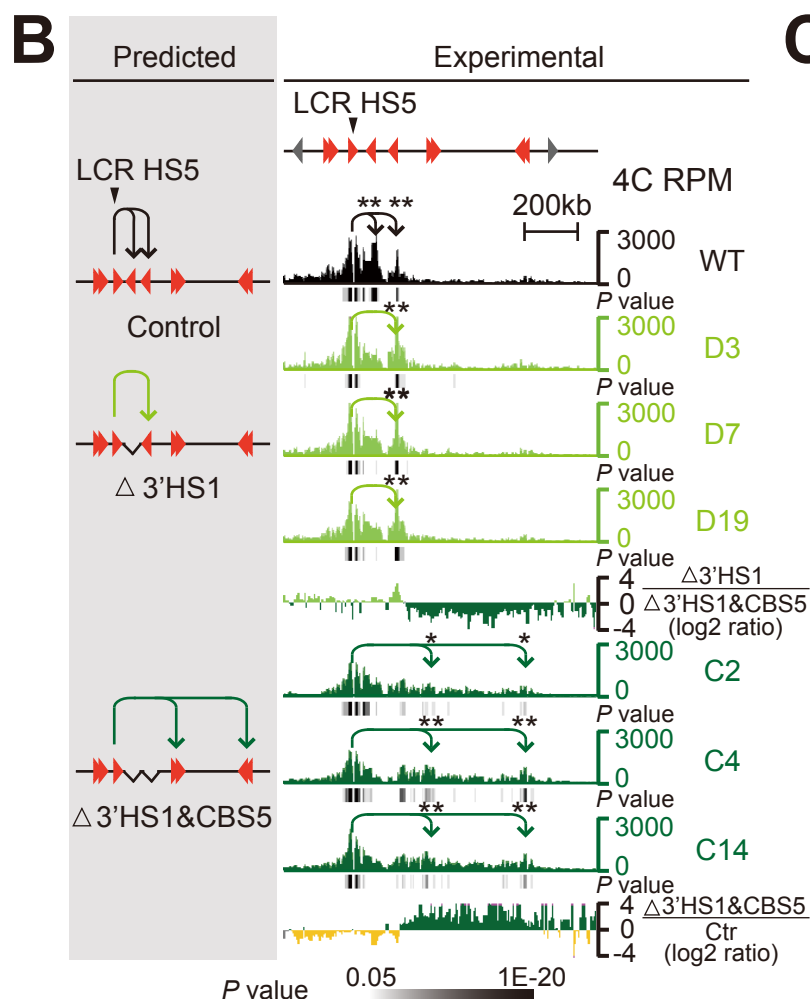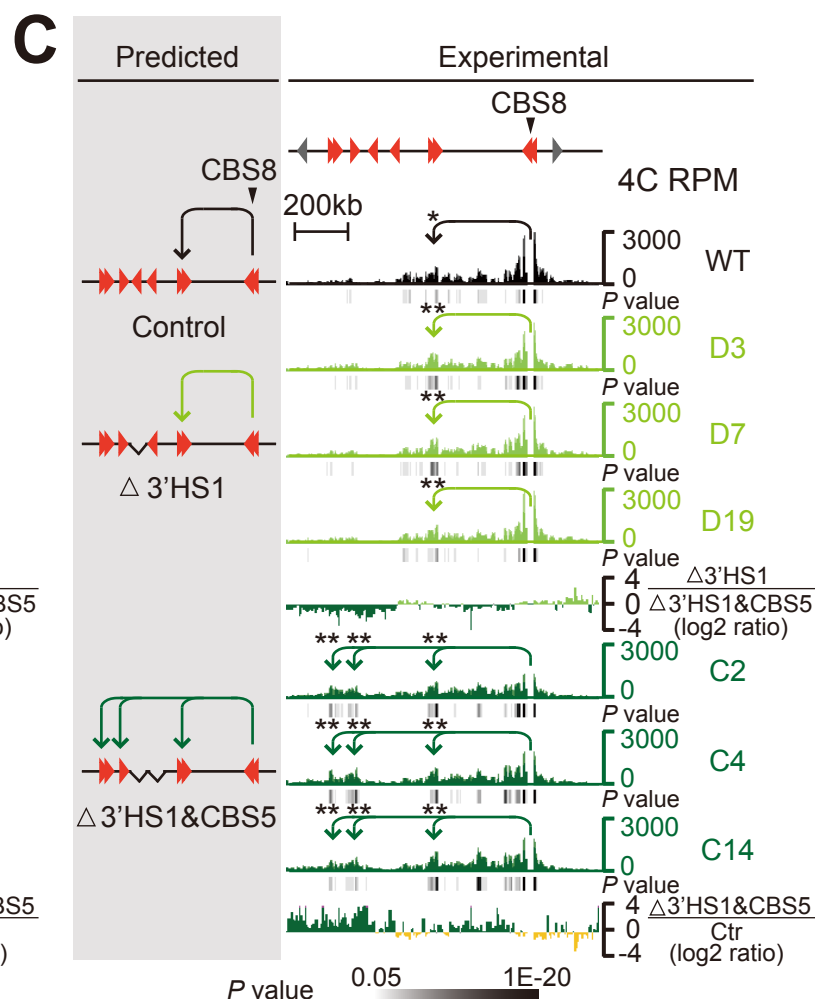

Supplement: NIHMS734799-supplement-Supplemental_figures.pdf [file NIHMS734799-supplement-Supplemental_figures.pdf]
