# Supplementary material
Source: PubMed Central journal article supplement (PMC4642453)
Supplement: NIHMS734799-supplement-SupplementalTable__Legends.pdf [file NIHMS734799-supplement-SupplementalTable__Legends.pdf]

normalized Hi-C counts, TADs, directionality index (DI), CTCF occupancy (Dixon et al., 2012; ENCODE Project Consortium, 2012), and the orientation of CBSs of a Chr12 genomic region are shown as an example. Note that all boundary regions of neighboring TADs (number 1-6) have CBS pairs in the reverse-forward orientation, except boundary number 5, which only has one close CBS in the forward orientation.

**Figure S5. CTCF/cohesin-mediated Directional DNA Looping in the Human  $\beta$ -globin Gene Cluster, Related to Figure 5**

(A) Diagram of the human  $\beta$ -globin cluster (yellow) and the flanking olfactory receptor (*OR*) clusters (gray). The *HS5* within *LCR* and *3'HS1* are indicated. Predicted looping interactions and topological domains, based on location and orientation of CBSs as well as both CTCF and cohesin (SMC3) co-occupancy in K562 cells, are also shown.

(B) The predicted interactions, in the control, CBS4-knockout (D3, D7, and D19), or CBS4/5 double-knockout (C2, C4, and C14) subcloned CRISPR cell lines, are confirmed by 4C with CBS3(5'HS5) as an anchor. The average log<sub>2</sub> ratios of interactions are indicated between the profiles. \**P* < 0.05 and \*\**P* < 0.01.

(C) The predicted interactions in the CBS4-knockout or CBS4/5 double-knockout cell lines are also confirmed by 4C with CBS8 as an anchor. \**P* < 0.05 and \*\**P* < 0.01.

## **SUPPLEMENTAL TABLES**

### **Table S1. CBSs and Their Orientations in K562 and MCF-7 Cells, Related to Figure 4**

Coordinates are based on the genome assembly of hg19. CBSs and their orientations were obtained from the CTCF ChIP-seq datasets of K562 and MCF-7 cells.

### **Table S2. Positions and Sequences of CBS Pairs in K562, E14, and MCF-7 Cells, Related to Figure 4**

The sequences of CBS pairs were obtained by analyzing the CTCF ChIA-PET datasets of K562, E14 pluripotent, and MCF-7 cells.

### **Table S3. Positions and Sequences of CBS Pairs at Different Chromatin-looping Strengths in K562 Cells, Related to Figure 4**

The sequences of CBS pairs were obtained by analyzing the CTCF ChIA-PET dataset of the ENCODE Project. The sequences of CBS pairs were obtained by analyzing the CTCF ChIA-PET dataset of the ENCODE Project. Positions

and sequences of CBS pairs at chromatin-looping strengths of 200, 300, 400, 500, and  $\geq 600$  in K562 cells were shown.

**Table S4. A Role of Cohesin in the Organization of Genome-wide CCDs in K562 and MCF-7 Cells, Related to Figure 4**

Shown are lists of genome-wide CTCF/cohesin co-occupied CBSs, CBS pairs of CTCF/cohesin co-occupancy from ChIA-PET dataset, CCDs merged from overlapping loops of CTCF/cohesin co-occupied CBS pairs, and orientation configuration of CBS pairs at CCD boundaries.

**Table S5. Human CCDs Based on the Orientations of Tethered CBS Pairs and their CTCF Occupancy in K562 and MCF-7 Cells, Related to Figure 4**

The CCDs were obtained by analyzing the CTCF ChIA-PET datasets of K562 and MCF-7 cells from the ENCODE Project.

**Table S6. Distribution of Orientation Configurations of CTCF-occupied CBS Pairs in the Boundaries Separating Neighboring CCDs in the Human Genome, Related to Figure 4**

The orientation configurations of boundary CBS pairs were obtained by analyzing the CTCF ChIA-PET datasets of K562 and MCF-7 cells from the ENCODE Project.

**Table S7. Primer Sets Used in This Study, Related to Experimental Procedures**
